# Supplementary material for: Recombinant Salmonella gallinarum (S. gallinarum) Vaccine Candidate Expressing Avian Pathogenic Escherichia coli Type I Fimbriae Provides Protections against APEC O78 and O161 Serogroups and S. gallinarum Infection
Source: MDPI journal article supplement (doi:10.3390/vaccines11121778), 2023-11-28
Supplement: s1 [file s1]

Table S1. Primers used in this study.

| Primers                           | Sequence (5' → 3')                                                          |
|-----------------------------------|-----------------------------------------------------------------------------|
| P1-C1                             | cacctcggcgacacctccaccggcacgctacaggacgctttgatctggTGTGTAG<br>GCTGGAGCTGCTTCGT |
| P2-C2                             | gccgccgggggtaattcgcgcatagtgatatccgatcgttcggcacCCATATGAAT<br>ATCCTCCTTAG     |
| P3                                | cggctctgttctcatgcaac                                                        |
| P4                                | gccaaactggcgcagcattcg                                                       |
| pBR322- <i>fim</i> NheI F         | cGCTAGCatgaaaattaaaactctgg                                                  |
| pYA3342- <i>fim</i> NcoI F        | gcgcCCATGGatgaaaattaaaactctgg                                               |
| pBR322/pYA3342- <i>fim</i> SalI R | cgcGTCGACttattgataaacaagtcac                                                |
