# Supplementary material for: Recombinant Salmonella gallinarum (S. gallinarum) Vaccine Candidate Expressing Avian Pathogenic Escherichia coli Type I Fimbriae Provides Protections against APEC O78 and O161 Serogroups and S. gallinarum Infection
Source: MDPI journal article supplement (doi:10.3390/vaccines11121778), 2023-11-28
Supplement: s1 [file s1]

Table S2. Anti-*Salmonella* *peg* antibody agglutination titers of chickens with different immunity periods.

| Serial<br>Number <sup>a</sup> | Agglutination antibody titers |       |       |       |       |       |       |       |       |        |
|-------------------------------|-------------------------------|-------|-------|-------|-------|-------|-------|-------|-------|--------|
|                               | 1 wpi <sup>b</sup>            | 2 wpi | 3 wpi | 4 wpi | 5 wpi | 6 wpi | 7 wpi | 8 wpi | 9 wpi | 10 wpi |
| SG101 immunized group         |                               |       |       |       |       |       |       |       |       |        |
| 1                             | N <sup>c</sup>                | N     | 1:1   | 1:8   | 1:8   | 1:8   | 1:16  | 1:8   | 1:4   | N      |
| 2                             | N                             | N     | N     | 1:4   | 1:16  | 1:16  | 1:8   | 1:8   | 1:8   | 1:4    |
| 3                             | N                             | N     | 1:1   | 1:8   | 1:8   | 1:16  | 1:16  | 1:16  | 1:16  | 1:8    |
| 4                             | N                             | N     | N     | 1:8   | 1:8   | 1:16  | 1:16  | 1:16  | 1:16  | 1:8    |
| 5                             | N                             | N     | N     | 1:8   | 1:8   | 1:16  | 1:16  | 1:8   | 1:8   | 1:4    |
| 6                             | N                             | N     | N     | 1:8   | 1:8   | 1:16  | 1:16  | 1:16  | 1:16  | 1:8    |
| 7                             | N                             | N     | N     | 1:4   | 1:16  | 1:16  | 1:16  | 1:16  | 1:16  | 1:8    |
| 8                             | N                             | N     | 1:1   | 1:8   | 1:8   | 1:8   | 1:16  | 1:16  | 1:8   | 1:4    |
| 9                             | N                             | N     | N     | 1:4   | 1:8   | 1:8   | 1:8   | 1:8   | 1:4   | 1:4    |
| 10                            | N                             | N     | N     | 1:2   | 1:8   | 1:8   | 1:8   | 1:8   | 1:4   | N      |
| SG102 immunized group         |                               |       |       |       |       |       |       |       |       |        |
| 11                            | N                             | N     | 1:1   | 1:8   | 1:8   | 1:8   | 1:16  | 1:16  | 1:16  | 1:16   |
| 12                            | N                             | N     | N     | 1:8   | 1:8   | 1:8   | 1:8   | 1:8   | 1:8   | 1:8    |
| 13                            | N                             | N     | 1:1   | 1:16  | 1:16  | 1:16  | 1:16  | 1:32  | 1:16  | 1:16   |
| 14                            | N                             | N     | N     | 1:4   | 1:8   | 1:8   | 1:8   | 1:8   | 1:8   | 1:4    |
| 15                            | N                             | N     | N     | 1:8   | 1:16  | 1:32  | 1:32  | 1:32  | 1:32  | 1:16   |
| 16                            | N                             | N     | N     | 1:8   | 1:8   | 1:16  | 1:16  | 1:16  | 1:16  | 1:16   |
| 17                            | N                             | N     | 1:1   | 1:8   | 1:16  | 1:16  | 1:16  | 1:16  | 1:16  | 1:16   |
| 18                            | N                             | N     | 1:1   | 1:8   | 1:16  | 1:32  | 1:16  | 1:16  | 1:16  | 1:8    |
| 19                            | N                             | N     | N     | 1:8   | 1:8   | 1:8   | 1:8   | 1:8   | 1:8   | 1:8    |
| 20                            | N                             | N     | 1:1   | 1:8   | 1:16  | 1:16  | 1:32  | 1:16  | 1:16  | 1:16   |
| PBS group                     |                               |       |       |       |       |       |       |       |       |        |
| 21                            | N                             | N     | N     | N     | N     | N     | N     | N     | N     | N      |
| 22                            | N                             | N     | N     | N     | N     | N     | N     | N     | N     | N      |
| 23                            | N                             | N     | N     | N     | N     | N     | N     | N     | N     | N      |
| 24                            | N                             | N     | N     | N     | N     | N     | N     | N     | N     | N      |
| 25                            | N                             | N     | N     | N     | N     | N     | N     | N     | N     | N      |
| 26                            | N                             | N     | N     | N     | N     | N     | N     | N     | N     | N      |
| 27                            | N                             | N     | N     | N     | N     | N     | N     | N     | N     | N      |
| 28                            | N                             | N     | N     | N     | N     | N     | N     | N     | N     | N      |
| 29                            | N                             | N     | N     | N     | N     | N     | N     | N     | N     | N      |
| 30                            | N                             | N     | N     | N     | N     | N     | N     | N     | N     | N      |

<sup>a</sup> Serial number of the chicken.

<sup>b</sup> Week post inoculation.

<sup>c</sup> Negative reaction.
