# Supplementary material for: Recombinant Salmonella gallinarum (S. gallinarum) Vaccine Candidate Expressing Avian Pathogenic Escherichia coli Type I Fimbriae Provides Protections against APEC O78 and O161 Serogroups and S. gallinarum Infection
Source: Vaccines (Basel). 2023 Nov 28;11(12):1778. doi: 10.3390/vaccines11121778 (PMC10747928; doi:10.3390/vaccines11121778)
Supplement: Supplementary file 1 [file vaccines-11-01778-s001.zip]

Archive with 4 entries (4 files):
- Figure S1. Average anti-Salmonella peg antibody agglutination titers of chickens at different weeks post inoculation.pdf
- Figure S2. Protection effects against S. gallinarum challenge.pdf
- Table S1. Primers used in this study.pdf
- Table S2. Anti-Salmonella peg antibody agglutination titers of chickens with different immunity periods.pdf
